# Supplementary material for: Cost-effectiveness of Artificial Intelligence for Proximal Caries Detection
Source: PubMed Central journal article supplement (PMC7985854; doi:10.1177/0022034520972335), 2020-11-16
Supplement: DS_10.1177_0022034520972335.pdf [file DS_10.1177_0022034520972335.pdf]

## **Appendix**

### *German healthcare*

In Germany, the medical insurance is two-tiered, with most individuals (>87%) being publicly insured (statutory insurance) and only a minority being privately insured. For members of the statutory insurance, nearly all dental procedures are fully covered, while only few need to be partially or fully paid out-of-pocket or by private (additional) insurances.

### *Synopsis of the systematic review we have built our comparator on*

Briefly, this review had included clinical or in vitro studies reporting on humans with primary caries lesions (clinical studies), or human teeth with primary natural caries lesions (in vitro studies), which were submitted to caries detection via radiographic means. Secondary lesions or teeth with artificially induced lesions were excluded. The caries status of the examined surface needed to be assessed using a reference test, i.e. a “gold standard”, which could have been destructive (histologic, microradiographic or operative assessment) or non-destructive (visual-tactile assessment without [occlusal] or with [proximal] tooth separation). Reported data should allow to construct a diagnostic 2x2 table. Electronic databases (Medline via PubMed, Embase via Ovid, Cochrane Central) had been screened for articles published until September 2014, without any further restriction regarding publication date or language. Diagnostic reviews were additionally searched via the Medion database.

### *Modelling period*

The teeth were followed over the patients' average lifetime, which was assumed to be 66 years from now on based on the life expectancy of males in Germany (deStatis 2017); note that this period of time only serves to determine the simulation period and would be minimal longer for females (without any relevant impact on outcomes).

### *Caries prevalence*

In the base-case, a population with low caries prevalence and low risk of lesion development and progression was simulated; in a sensitivity analysis, a population with high prevalence and risk was assessed. The rationale for not modelling this uncertainty in one joint evaluation (e.g. using uncertainty distributions) was to display risk-specific cost-effectiveness, as this has been found relevant in the context of our study (Schwendicke et al. 2015a). Surface-prevalence of proximal caries lesions was estimated based on data from Sweden (Mejäre et al. 2004) as described before (Schwendicke et al. 2015a).

### *Cost estimation*

German dentists use fee items to claim for reimbursement for dental treatments. For most dental procedures and patients, items will be drawn from the public catalogue BEMA. For few treatments (composite restorations in posterior teeth, implants and ISC), fees are usually derived from the private catalogue; publicly insured patients pay the additional costs out-of-pocket or via additional private insurers. For GOZ, factoring of the chargeable item points is common to determine the fees of private treatment in Germany; we used the standard multiplication factor (2.3). Using fee items allowed us to estimate costs occurring to payers, which was in line with our study perspective (Schwendicke et al. 2013a).

BEMA defines fee items within the public insurance, which covers 87% of insured Germans (GKV-Spitzenverband 2013), with only few treatments not being fully covered or reimbursed. For these items, calculation was based on GOZ or “analogue-items”. BEMA points vary between federal states, insurers and treatment groups. For our cost calculation we used mean state points for the biggest insurer (AOK) from one federal state, Bavaria. For GOZ, point values were applied, with 0.0562421 Euro/point. Factoring of GOZ item-points was usually performed via the standard multiplication factor ( $\times 2.3$ ). Certain positions (mainly radiographic assessments) are further coded in GOÄ (Gebührenordnung für Ärzte), with 9 GOÄ points equaling 1 BEMA point. Laboratory and material costs were estimated based on Laboratory Fee Catalogues (BEL II/BEB). Costs for BELII/BEB have been transformed into monetary values for the following tables. Items were restricted in number and character to reflect cost

limitations. Total costs per course of treatment were calculated based on the quantification (q) of itemized costs (c), i.e.  $c_1 \times q_1 + c_2 \times q_2$  etc., and calculated in Euro. Details can be found further below.

#### *Net benefit approach and cost-effectiveness acceptability*

Using estimates for costs (c, in Euro) and effectiveness (e, in years), the net benefit of each strategy combination was calculated using the formula

$$\text{net benefit} = \lambda \times \Delta e - \Delta c,$$

with  $\lambda$  denoting the ceiling threshold of willingness to pay, i.e. the additional costs a decision maker is willing to bear for gaining an additional unit of effectiveness (Drummond et al. 2005). If  $\lambda > \Delta c / \Delta e$ , an alternative intervention is considered more cost-effective than the comparator despite possibly being more costly (Briggs et al. 2002). We used the net-benefit approach to calculate the probability of a detection strategy being acceptable regarding its cost-effectiveness for payers with different willingness-to-pay ceiling thresholds.

#### *Detailed calculation of costs per course of treatment*

Costs for visual-tactile detection were assumed to be based on BEMA 01. We assumed that the costs of a regular examination would be distributed over all examined teeth and expected an average of 28 teeth to be examined, i.e. BEMA 01 equaling 18.90 Euro divided by 28 = 0.68 Euro. Costs for radiographic assessment were estimated based on BEMA Ä925a. We assumed all posterior teeth to be assessed, i.e. costs were distributed over 16 teeth. Hence, GOÄ925a equaling 12.60 was divided by 16 = 0.79. The costs for the AI intervention were varied between 4.00 to 12.00 Euro per image analysis, as it is currently unclear which costs would be generated; the base-case costs were set at 8.00 Euro. AI costs were also distributed over the teeth as described. A more detailed assessment of AI costs can be found below. Infiltration was assumed to cost 84.99 Euro as described elsewhere (Schwendicke et al. 2014b). All other costs were estimated as follows.

## (1) Costs for AI

We assumed the following costs to have occurred for establishing the AI intervention:

- Data generation and labeling: 3,686 images, 4 annotators, each annotation per image 5 min, average salary incl tax and social security contributions approx. 39,- Euro/h (TV-Ä Charité); in total 47.918 Euro
- Training of the AI model, approx. 4 months data science costs, at monthly costs for 5.750,- Euro (TV-E13), in total 23.000 Euro
- Software engineering costs for the intervention, approx. 12 months full time at 5.750,- Euro (TV-E13), in total 69.000 Euro
- Regulatory process incl. user tests, clinical evaluation, technical documentation and quality management system (might be available already, though), approx. 100,000 Euro
- Total development costs: 239,918 Euro. These were assumed to be distributed over the first 100,000 use cases, i.e. analyses, i.e. 2.40 Euro per image.

We further assumed costs per goods sold (COGS) to occur as follows:

- Cloud infrastructure. According to our simulations, costs of 1-3 Euro per image analysis occur depending on the load and the accepted waiting time for each dentist.
- Support etc. including possible step-by-step instructions; we assumed one monthly email and one monthly phone contact, each consuming 10 min of a support employee's time, i.e. 39,- Euro per hour (TV-E13), in total 13 Euro/ month. Assuming each dentist to use the intervention for each bitewing, at an estimated number of 20 bitewings per month, this summed up to 0.65 Euro per month.
- The total COGS hence summed up to 1.65-3.65 Euro/image.

Total costs per image were hence assumed to be 4.05 Euro to 6.05 Euro per analysis. We further assumed any provider of such a tool would also need to generate additional revenue for management, sales and marketing, development and profit (overhead), and assumed this block to account for 55% of the abovementioned costs (i.e. 2.24-3.33 Euro). Hence, total costs were assumed to range between 6.29-9.38 Euro. Given that developmental costs would, however, be diluted with each use case exceeding 100,000 analyses, and given that the costs for revenue, sales and marketing, development and profit would also be reduced if the intervention was scaled up in its use, our cost estimate between 4-12 Euro seemed to realistically cover possible cost scenarios.

(2) Direct capping and direct restoration

| <b>Treatment</b>                            | <b>Position<br/>BEMA/GOÄ/GOZ/L</b> | <b>Points</b> | <b>Number of<br/>Treatments</b> | <b>Euros</b>  |
|---------------------------------------------|------------------------------------|---------------|---------------------------------|---------------|
| Clinical investigation                      | 01                                 | 18            | 1                               | 18.9          |
| Sensitivity testing                         | 8                                  | 6             | 1                               | 6.3           |
| Radiographic assessment                     | GOÄ925 a                           | 12            | 1                               | 12.6          |
| Anesthesia                                  | 40/41a                             | 8/12          | 1                               | 10.5          |
| Special measures during restorative therapy | 12                                 | 10            | 1                               | 10.5          |
| Adhesive restoration, two surfaces          | GOZ 2100                           | 556           | 1                               | 71.92         |
| Liner                                       | 25                                 | 6             | 1                               | 6.3           |
| Direct capping                              | 26                                 | 6             | 1                               | 6.3           |
| <b>Total</b>                                |                                    |               |                                 | <b>143.32</b> |

(3) No capping, and direct restoration

| <b>Treatment</b>                            | <b>Position<br/>BEMA/GOÄ/GOZ/L</b> | <b>Points</b> | <b>Number of<br/>Treatments</b> | <b>Euros</b>  |
|---------------------------------------------|------------------------------------|---------------|---------------------------------|---------------|
| Clinical investigation                      | 01                                 | 18            | 1                               | 18.9          |
| Sensitivity testing                         | 8                                  | 6             | 1                               | 6.3           |
| Radiographic assessment                     | GOÄ925 a                           | 12            | 1                               | 12.6          |
| Anesthesia                                  | 40/41a                             | 8/12          | 1                               | 10.5          |
| Special measures during restorative therapy | 12                                 | 10            | 1                               | 10.5          |
| Adhesive restoration, two surfaces          | GOZ 2100                           | 556           | 1                               | 71.92         |
| Liner                                       | 25                                 | 6             | 1                               | 6.3           |
| <b>Total</b>                                |                                    |               |                                 | <b>137.02</b> |

(4) Repair of existing restorations

| <b>Treatment</b>        | <b>Position<br/>BEMA/GOÄ/GOZ/L</b> | <b>Points</b> | <b>Number of<br/>Treatments</b> | <b>Euros</b> |
|-------------------------|------------------------------------|---------------|---------------------------------|--------------|
| Clinical investigation  | 01                                 | 18            | 1                               | 18.9         |
| Sensitivity testing     | 8                                  | 6             | 1                               | 6.3          |
| Radiographic assessment | GOÄ925 a                           | 12            | 1                               | 12.6         |
| Anesthesia              | 40/41a                             | 8/12          | 1                               | 10.5         |
| Filling, three surfaces | 13c                                | 39            | 1                               | 42.90        |
| <b>Total</b>            |                                    |               |                                 | <b>91.20</b> |

(5) Root-canal treatment (assumed three root canals)

| <b>Treatment</b>        | <b>Position<br/>BEMA/GOÄ/GOZ/L</b> | <b>Points</b> | <b>Number of<br/>Treatments</b> | <b>Euros</b>  |
|-------------------------|------------------------------------|---------------|---------------------------------|---------------|
| Clinical investigation  | 01                                 | 18            | 1                               | 18.9          |
| Sensitivity testing     | 8                                  | 6             | 1                               | 6.3           |
| Radiographic assessment | GOÄ925 a                           | 12            | 3                               | 37.8          |
| Anesthesia              | 40/41a                             | 8/12          | 1                               | 10.5          |
| Rubber dam              | 12                                 | 10            | 3                               | 31.5          |
| Direct core build-up    | 13B                                | 39            | 1                               | 40.95         |
| Vital pulp extirpation  | 28                                 | 18 per canal  | 3                               | 56.7          |
| Root canal treatment    | 32                                 | 29 per canal  | 3                               | 91.35         |
| Root canal filling      | 35                                 | 17 per canal  | 3                               | 53.55         |
| <b>Total</b>            |                                    |               |                                 | <b>347.55</b> |

## (6) Full metal crown

| <b>Treatment</b>                            | <b>Position<br/>BEMA/GOÄ/GOZ/L</b> | <b>Points</b> | <b>Number of<br/>Treatments</b> | <b>Euros</b>  |
|---------------------------------------------|------------------------------------|---------------|---------------------------------|---------------|
| Clinical investigation                      | 01                                 | 18            | 1                               | 18.9          |
| Sensitivity testing                         | 8                                  | 6             | 1                               | 6.3           |
| Radiographic assessment                     | GOÄ925 a                           | 12            | 1                               | 12.6          |
| Anesthesia                                  | 40/41a                             | 8/12          | 1                               | 10.5          |
| Special measures during restorative therapy | 12                                 | 10            | 1                               | 10.5          |
| Temporary crown                             | 19                                 | 19            | 1                               | 16.75         |
| Full metal crown                            | 20a                                | 148           | 1                               | 130.53        |
| Dental materials                            |                                    |               |                                 | 22.07         |
| <i>Laboratory</i>                           |                                    |               |                                 |               |
| Situation model                             | 0010                               | 5.74          | 2                               | 11.48         |
| Used resin                                  | 0023                               | 12.14         | 1                               | 12.14         |
| Single-tooth dye                            | 0051                               | 9.19          | 1                               | 9.19          |
| Occludator                                  | 0120                               | 8.42          | 1                               | 8.42          |
| Full-metal crown                            | 1021                               | 72.27         | 1                               | 72.27         |
| Non-precious metal alloy                    | 9700                               | 11.68         | 1                               | 11.68         |
| Delivery                                    | 9330                               | 3.98          | 3                               | 11.94         |
| <b>Total</b>                                |                                    |               |                                 | <b>365.27</b> |

## (7) Post-core crown

| <b>Treatment</b>        | <b>Position<br/>BEMA/GOÄ/GOZ/L</b> | <b>Points</b> | <b>Number of<br/>Treatments</b> | <b>Euros</b> |
|-------------------------|------------------------------------|---------------|---------------------------------|--------------|
| Clinical investigation  | 01                                 | 18            | 1                               | 18.9         |
| Sensitivity testing     | 8                                  | 6             | 1                               | 6.3          |
| Radiographic assessment | GOÄ925 a                           | 12            | 1                               | 12.6         |
| Post-core metal         | 18b                                | 80            | 1                               | 84           |
| Temporary post          | 21                                 | 28            | 1                               | 24.69        |

|                                  |      |       |   |               |
|----------------------------------|------|-------|---|---------------|
| Temporary crown                  | 19   | 19    | 1 | 16.75         |
| Recementation of temporary crown | 24c  | 7     | 1 | 7.35          |
| Full metal crown                 | 20a  | 148   | 1 | 130.53        |
| Dental materials                 |      |       |   | 22.07         |
| <i>Laboratory</i>                |      |       |   |               |
| Situation model                  | 0010 | 5.74  | 2 | 11.48         |
| Used resin                       | 0023 | 12.14 | 1 | 12.14         |
| Single-tooth dye                 | 0051 | 9.19  | 1 | 9.19          |
| Occludator                       | 0120 | 8.42  | 1 | 8.42          |
| Metal post casting               | 1050 | 44.92 | 1 | 44.92         |
| Full-metal crown                 | 1021 | 72.27 | 1 | 72.27         |
| Non-precious metal alloy         | 9700 | 11.68 | 1 | 11.68         |
| Delivery                         | 9330 | 3.98  | 3 | 11.94         |
| <b>Total</b>                     |      |       |   | <b>505.23</b> |



## (8) Recementation

| <b>Treatment</b>         | <b>Position<br/>BEMA/GOÄ/GOZ/L</b> | <b>Points</b> | <b>Number of<br/>Treatments</b> | <b>Euros</b> |
|--------------------------|------------------------------------|---------------|---------------------------------|--------------|
| Clinical investigation   | 01                                 | 18            | 1                               | 18.9         |
| Sensitivity testing      | 8                                  | 6             | 1                               | 6.3          |
| Radiographic assessment  | GOÄ925 a                           | 12            | 1                               | 12.6         |
| Recementation of a crown | 24a                                | 25            | 1                               | 26.25        |
| <b>Total</b>             |                                    |               |                                 | <b>64.05</b> |

## (9) Non-surgical root canal retreatment

| <b>Treatment</b>        | <b>Position<br/>BEMA/GOÄ/GOZ/L</b> | <b>Points</b> | <b>Number of<br/>Treatments</b> | <b>Euros</b> |
|-------------------------|------------------------------------|---------------|---------------------------------|--------------|
| Clinical investigation  | 01                                 | 18            | 1                               | 18.9         |
| Sensitivity testing     | 8                                  | 6             | 1                               | 6.3          |
| Radiographic assessment | GOÄ 5000                           | 50            | 3                               | 19.40        |
| Anesthesia              | GOÄ 0090/0100                      | 60/70         | 1                               | 8.41         |
| Rubber dam              | GOZ 2040                           | 65            | 3                               | 25.23        |
| Root canal treatment    | GOZ 2410                           | 392 per canal | 3                               | 152.13       |
| Irrigation              | GOZ 2420                           | 70            | 3                               | 27.15        |
| Microscopy              | GOZ 0110                           | 400           | 3                               | 155.20       |
| Root canal filling      | GOZ 2440                           | 258 per canal | 3                               | 100.11       |
| Medication              | GOZ 2430                           | 204 per visit | 3                               | 79.17        |
| <b>Total</b>            |                                    |               |                                 | <b>592</b>   |

(10) Surgical root canal retreatment

| <b>Treatment</b>        | <b>Position<br/>BEMA/GOÄ/GOZ/L</b> | <b>Points</b> | <b>Number of<br/>Treatments</b> | <b>Euros</b>  |
|-------------------------|------------------------------------|---------------|---------------------------------|---------------|
| Clinical investigation  | 01                                 | 18            | 1                               | 18.9          |
| Sensitivity testing     | 8                                  | 6             | 1                               | 6.3           |
| Anesthesia              | 40/41a                             | 8/12          | 1                               | 10.5          |
| Radiographic assessment | GOÄ925 a                           | 12            | 2                               | 25.2          |
| Apicectomy              | 54b                                | 96            | 1                               | 100.8         |
| Retrograde filling      | 35                                 | 17 per canal  | 1                               | 17.85         |
| <b>Total</b>            |                                    |               |                                 | <b>179.55</b> |

(11) Tooth/implant removal

| <b>Treatment</b>                | <b>Position<br/>BEMA/GOÄ/GOZ/L</b> | <b>Points</b> | <b>Number of<br/>Treatments</b> | <b>Euros</b> |
|---------------------------------|------------------------------------|---------------|---------------------------------|--------------|
| Clinical investigation          | 01                                 | 18            | 1                               | 18.9         |
| Sensitivity testing             | 8                                  | 6             | 1                               | 6.3          |
| Radiographic assessment         | GOÄ925 a                           | 12            | 2                               | 25.2         |
| Anesthesia                      | 40/41a                             | 8/12          | 1                               | 10.5         |
| Extraction of multirooted tooth | 44                                 | 15            | 1                               | 15.75        |
| <b>Total</b>                    |                                    |               |                                 | <b>76.65</b> |

## (12) Implant insertion

| <b>Treatment</b>                  | <b>Position<br/>BEMA/GOÄ/GOZ/L</b> | <b>Number of<br/>Treatments</b> | <b>Euros</b> |
|-----------------------------------|------------------------------------|---------------------------------|--------------|
| Initial charting and consultation | GOÄ1                               | 1                               | 10.72        |
| Intra-oral investigation          | GOÄ6                               | 1                               | 13.41        |
| Detailed consultation             | GOÄ3                               | 1                               | 20.11        |
| Cost estimation                   | GOZ 0030                           | 1                               | 25.87        |
| Panoramic radiograph              | GOÄ 5004                           | 2                               | 107.24       |
| Diagnostic models                 | GOZ 0050                           | 1                               | 15.52        |
| Radiographic diagnosis and guide  | GOZ 9000                           | 1                               | 114.35       |
| Use of radiographic guide         | GOZ9003                            | 1                               | 12.94        |
| Implant insertion                 | GOZ 9010                           | 1                               | 199.86       |
| Implant                           |                                    | 1                               | 131.86       |
| Suture material                   |                                    | 1                               | 7.68         |
| Post-operative care               | GOZ 3300                           | 2                               | 16.82        |
| Prescription and medication       | GOÄ 70                             | 1                               | 5.36         |
| Topical anesthesia                | GOZ 0080                           | 2                               | 7.76         |
| Anesthesia                        | GOÄ 0090/0100                      | 2                               | 16.82        |
| Implant re-exposure               | GOZ 9040                           | 1                               | 80.98        |
| Gingiva-former                    |                                    | 1                               | 25.70        |
| <i>Laboratory</i>                 |                                    |                                 |              |
| Situation model                   | 0002                               | 3                               | 28.08        |
| Replica                           | 0241                               | 1                               | 15.20        |
| Occludator                        | 0402                               | 1                               | 10.16        |
| Diagnostic wax-up                 | 0832                               | 1                               | 10.30        |

|                    |      |   |               |
|--------------------|------|---|---------------|
| Positioning splint | 1224 | 1 | 60.20         |
| Radiographic guide | 1311 | 1 | 3.92          |
| Delivery           | 0701 | 3 | 17.82         |
| <b>Total</b>       |      |   | <b>958.68</b> |

(13) Implant-supported porcelain-bonded crown

| <b>Treatment</b>               | <b>Position<br/>BEMA/GOÄ/GOZ/L</b> | <b>Number of<br/>Treatments</b> | <b>Euros</b> |
|--------------------------------|------------------------------------|---------------------------------|--------------|
| Crown preparation              | GOZ 2200                           | 1                               | 171.01       |
| Temporary crown                | GOZ 2270                           | 1                               | 34.93        |
| Manipulation of abutments      | GOZ 9050                           | 2                               | 80.98        |
| Individual impression          | GOZ 5170                           | 1                               | 32.34        |
| Dental materials               |                                    |                                 | 22.07        |
| <i>Laboratory</i>              |                                    |                                 |              |
| Situation model                | 0010                               | 3                               | 17.22        |
| Individual tray                | 0211                               | 1                               | 19.51        |
| Used resin                     | 0023                               | 1                               | 12.14        |
| Single-tooth dye               | 0051                               | 1                               | 9.19         |
| Occludator                     | 0120                               | 1                               | 8.42         |
| Gingival mask                  | 0223                               | 1                               | 10.99        |
| Working with a supra-structure | 2971                               | 1                               | 25.77        |
| Working on abutment            | 2973                               | 1                               | 47.47        |
| Crown core                     | 2122                               | 1                               | 70.26        |
| Porcelain coverage             | 2612                               | 1                               | 99.83        |
| Non-precious metal alloy       | 9700                               | 1                               | 11.68        |
| Delivery                       | 9330                               | 6                               | 25.98        |
| Impression post                | 9237                               | 1                               | 56.54        |
| Laboratory implant             | 9238                               | 1                               | 25.40        |
| Abutment and screw             | 9239                               | 1                               | 84.82        |

|              |  |  |               |
|--------------|--|--|---------------|
| <b>Total</b> |  |  | <b>866.55</b> |
|--------------|--|--|---------------|
